# Supplementary material
Source: Springer Nature journal article supplement (https://www.springermedizin.de/resource/supplementary/12958_2011_884_MOESM1_ESM.pdf/9568736)

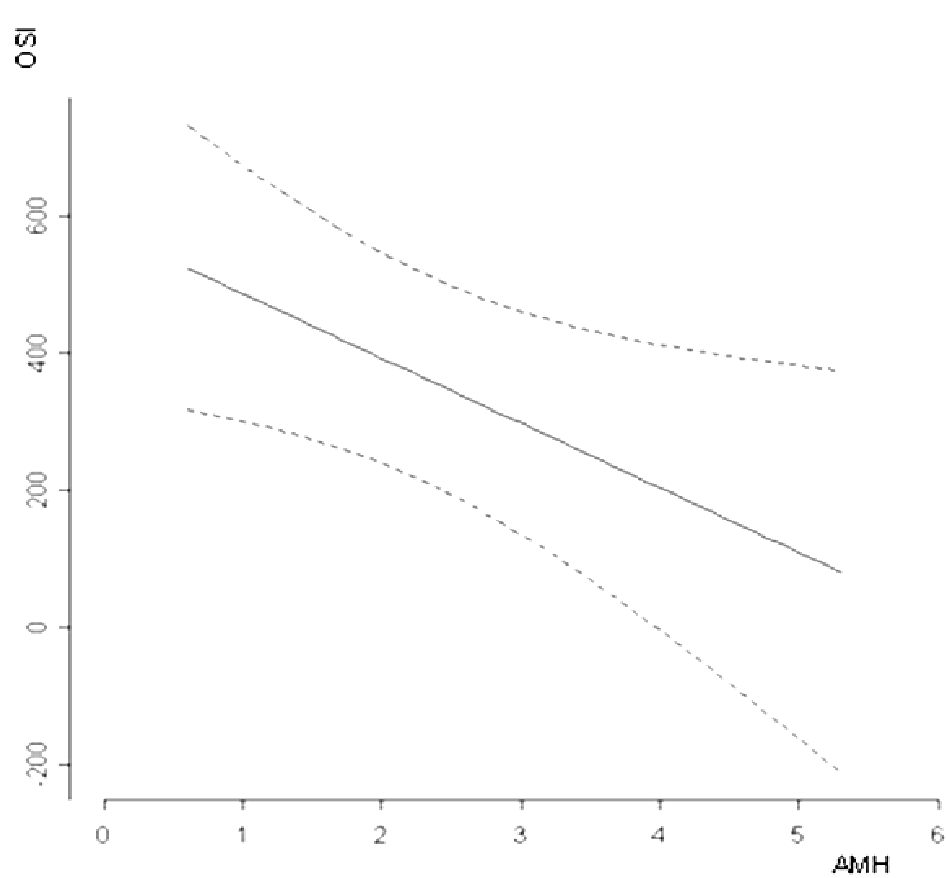

Supplement: MOESM1 [file 9568736]
